# Supplementary material
Source: Springer Nature journal article supplement (https://www.springermedizin.de/resource/supplementary/12943_2010_743_MOESM2_ESM.pdf/9554718)

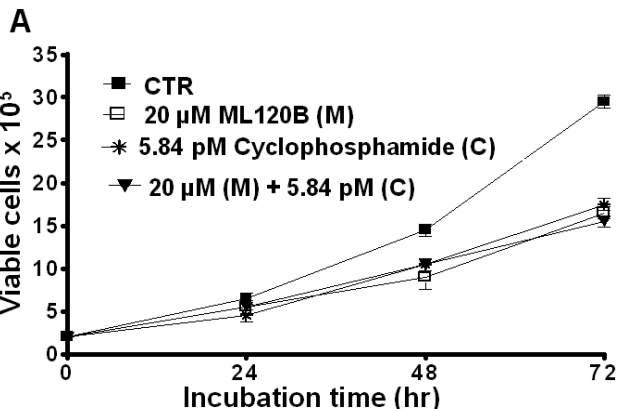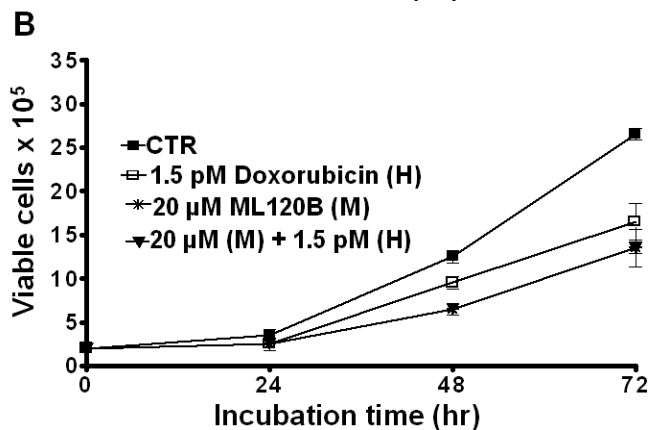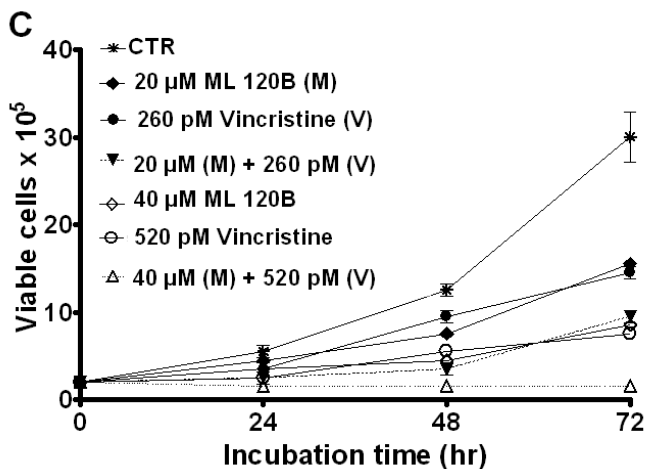

**D**

| Treatment                | P value |
|--------------------------|---------|
| M vs M+C                 | NS      |
| C vs M+C                 | NS      |
| M vs M+H                 | NS      |
| H vs M+H                 | NS      |
| M(20) vs M(20) + V(260)  | NS      |
| V(260) vs M(20) + V(260) | NS      |
| M(40) vs M(40) + V(520)  | 0.0357  |
| V(520) vs M(40) + V(520) | 0.0421  |

**E**

| ML120B( $\mu$ M) | Vincristine (pM) | F.A.   | C.I.  |
|------------------|------------------|--------|-------|
| 10               | 130              | 0.6458 | 0.654 |
| 20               | 260              | 0.8125 | 0.225 |
| 30               | 390              | 0.9583 | 0.013 |
| 40               | 520              | 0.9791 | 0.004 |

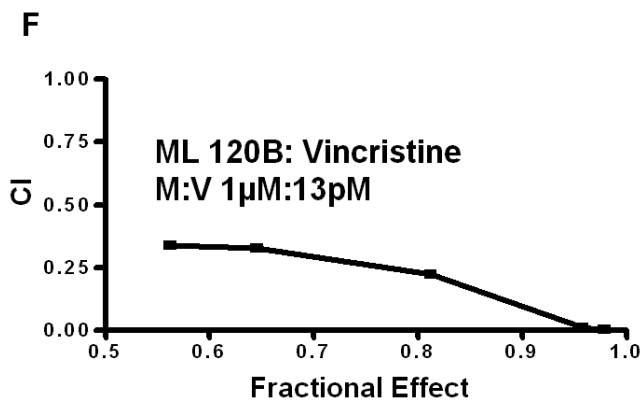

Supplement: MOESM2 [file 9554718]
